# Supplementary material for: Complete Chloroplast Genome Sequences of Lonicera Japonica Cv. Damaohua: Characterization and Comparative and Phylogenetic Analyses
Source: Research Square preprint supplement (doi:10.21203/rs.3.rs-1433587/v1), 2022-03-18
Supplement: Supplementary file 1 [file 5b03d95c8c0b203392ce560c.xls]

## Sheet: Table 1
Table 1. Base composition in the L. japonica cv. Damaohua chloroplast genome.
Region	Length	T(U) (%)	C (%)	A (%)	G (%)
Genome	155151	31.2	19.6	30.2	19
LSC	88924	32.1	19	30.8	18.1
SSC	18649	34.3	16.9	32.3	16.5
IRa	23789	28.7	23.1	27.9	20.4
IRb	23789	27.9	20.4	28.7	23.1
CDS	74214	31.3	18.1	30	20.6
CDS, 1 position	24738	23.7	19.3	29.7	27.3
CDS, 2 position	24738	32.5	20.6	28.9	18
CDS, 3 position	24738	37.7	14.4	31.4	16.5

## Sheet: Table 2
Table 2. The introns in the genes of the L. japonica cv. Damaohua chloroplast genome.
GeneID	Gene	Exon Ⅰ（bp）	Intron Ⅰ（bp）	Exon Ⅱ（bp）	Intron Ⅱ（bp）	Exon Ⅲ（bp）
1	atpF	144	735	409
2	ndhA	552	1092	538
3	ndhB	776	678	755
4	rpl2	386	671	428
5	rpoC1	431	776	1607
6	rps12	113	231	535	－	31
7	rps16	39	868	229
8	rps18	160	307	30
9	trnA-UGC	37	808	34
10	trnG-GCC	22	716	46
11	trnI-GAU	36	946	34
12	trnK-UUU	36	2534	34
13	trnL-UAA	35	512	48
14	trnV-UAC	39	564	35
15	ycf2	6118	248	483
16	ycf3	123	731	229	759	152

## Sheet: Table 3
Table 3. Comparison of the general features in six Lonicera species chloroplast genomes.
Species	GenBank accession numbers (bp)	All length (bp)	LSC Length (bp)	SSC Length (bp)	IR Length (bp)	Protein Coding	tRNA LSC	rRNA IRA	Total GC (%)
L. japonica cv. Damaohua	MZ779026	155151	88924	18675	23776	80	39	8	38.6
L. macranthoides	NC_040959	154897	88692	18623	23791	84	39	8	38.5
L. confusa	NC_045045	155346	89122	18634	23795	84	37	8	38.6
L. japonica	NC_026839	155078	88858	18672	23774	84	39	8	38.6
L. maackii	NC_039636	155318	89202	18680	23718	86	37	8	38.5
L. insularis	MH028739	155124	88230	18774	24060	86	37	8	38.3

## Sheet: Table 4
Table 4. Number of different SSR types in the chloroplast genome of six Lonicera species.
SSR types	L.japonica cv. Damaohua	L.macranthoides	L.confusa	L.japonica	L.maackii	L.insularis
Mononucleotide	36	33	37	29	29	33
Dinucleotide	4	6	4	4	7	6
Trinucleotide	2	4	2	2	1	2
Tetranucleotide	9	7	8	9	10	9
Pentanucleotide	-	1	-	-	-	-
Hexanucleotide	3	-	3	3	1	2
Total	54	51	54	47	48	52
